# Supplementary material for: Genome-wide association study reveals SNP markers controlling drought tolerance and related agronomic traits in chickpea across multiple environments
Source: Front Plant Sci. 2024 Mar 8;15:1260690. doi: 10.3389/fpls.2024.1260690 (PMC10957531; doi:10.3389/fpls.2024.1260690)
Supplement: Supplementary Table 5 — Shared Marker Trait Associations (MTAs) among Traits. [file Table_5.xlsx]

## Sheet: S5_Table
Common elements count between rs100SW and rsDFL: 5
Common elements count between rs100SW and rsDM: 7
Common elements count between rs100SW and rsBY: 6
Common elements count between rs100SW and rsDR: 2
Common elements count between rs100SW and rsGY: 3
Common elements count between rs100SW and rsHI: 6
Common elements count between rs100SW and rsNB: 7
Common elements count between rs100SW and rsNDW: 9
Common elements count between rs100SW and rsNFW: 11
Common elements count between rs100SW and rsPLH: 7
Common elements count between rsDFL and rs100SW: 5
Common elements count between rsDFL and rsDM: 20
Common elements count between rsDFL and rsBY: 8
Common elements count between rsDFL and rsDR: 14
Common elements count between rsDFL and rsGY: 7
Common elements count between rsDFL and rsHI: 3
Common elements count between rsDFL and rsNB: 3
Common elements count between rsDFL and rsNDW: 8
Common elements count between rsDFL and rsNFW: 8
Common elements count between rsDFL and rsPLH: 16
Common elements count between rsDM and rs100SW: 7
Common elements count between rsDM and rsDFL: 20
Common elements count between rsDM and rsBY: 6
Common elements count between rsDM and rsDR: 8
Common elements count between rsDM and rsGY: 2
Common elements count between rsDM and rsHI: 9
Common elements count between rsDM and rsNB: 2
Common elements count between rsDM and rsNDW: 6
Common elements count between rsDM and rsNFW: 3
Common elements count between rsDM and rsPLH: 23
Common elements count between rsBY and rs100SW: 6
Common elements count between rsBY and rsDFL: 8
Common elements count between rsBY and rsDM: 6
Common elements count between rsBY and rsDR: 5
Common elements count between rsBY and rsGY: 17
Common elements count between rsBY and rsHI: 1
Common elements count between rsBY and rsNB: 4
Common elements count between rsBY and rsNDW: 8
Common elements count between rsBY and rsNFW: 9
Common elements count between rsBY and rsPLH: 4
Common elements count between rsDR and rs100SW: 2
Common elements count between rsDR and rsDFL: 14
Common elements count between rsDR and rsDM: 8
Common elements count between rsDR and rsBY: 5
Common elements count between rsDR and rsGY: 7
Common elements count between rsDR and rsHI: 6
Common elements count between rsDR and rsNB: 3
Common elements count between rsDR and rsNDW: 6
Common elements count between rsDR and rsNFW: 5
Common elements count between rsDR and rsPLH: 6
Common elements count between rsGY and rs100SW: 3
Common elements count between rsGY and rsDFL: 7
Common elements count between rsGY and rsDM: 2
Common elements count between rsGY and rsBY: 17
Common elements count between rsGY and rsDR: 7
Common elements count between rsGY and rsHI: 5
Common elements count between rsGY and rsNB: 3
Common elements count between rsGY and rsNDW: 6
Common elements count between rsGY and rsNFW: 6
Common elements count between rsGY and rsPLH: 3
Common elements count between rsHI and rs100SW: 6
Common elements count between rsHI and rsDFL: 3
Common elements count between rsHI and rsDM: 9
Common elements count between rsHI and rsBY: 1
Common elements count between rsHI and rsDR: 6
Common elements count between rsHI and rsGY: 5
Common elements count between rsHI and rsNB: 10
Common elements count between rsHI and rsNDW: 11
Common elements count between rsHI and rsNFW: 14
Common elements count between rsHI and rsPLH: 4
Common elements count between rsNB and rs100SW: 7
Common elements count between rsNB and rsDFL: 3
Common elements count between rsNB and rsDM: 2
Common elements count between rsNB and rsBY: 4
Common elements count between rsNB and rsDR: 3
Common elements count between rsNB and rsGY: 3
Common elements count between rsNB and rsHI: 10
Common elements count between rsNB and rsNDW: 30
Common elements count between rsNB and rsNFW: 37
Common elements count between rsNB and rsPLH: 1
Common elements count between rsNDW and rs100SW: 9
Common elements count between rsNDW and rsDFL: 8
Common elements count between rsNDW and rsDM: 6
Common elements count between rsNDW and rsBY: 8
Common elements count between rsNDW and rsDR: 6
Common elements count between rsNDW and rsGY: 6
Common elements count between rsNDW and rsHI: 11
Common elements count between rsNDW and rsNB: 30
Common elements count between rsNDW and rsNFW: 31
Common elements count between rsNDW and rsPLH: 6
Common elements count between rsNFW and rs100SW: 11
Common elements count between rsNFW and rsDFL: 8
Common elements count between rsNFW and rsDM: 3
Common elements count between rsNFW and rsBY: 9
Common elements count between rsNFW and rsDR: 5
Common elements count between rsNFW and rsGY: 6
Common elements count between rsNFW and rsHI: 14
Common elements count between rsNFW and rsNB: 37
Common elements count between rsNFW and rsNDW: 31
Common elements count between rsNFW and rsPLH: 2
Common elements count between rsPLH and rs100SW: 7
Common elements count between rsPLH and rsDFL: 16
Common elements count between rsPLH and rsDM: 23
Common elements count between rsPLH and rsBY: 4
Common elements count between rsPLH and rsDR: 6
Common elements count between rsPLH and rsGY: 3
Common elements count between rsPLH and rsHI: 4
Common elements count between rsPLH and rsNB: 1
Common elements count between rsPLH and rsNDW: 6
Common elements count between rsPLH and rsNFW: 2
